# Supplementary material for: RNA Polymerase II Binding Patterns Reveal Genomic Regions Involved in MicroRNA Gene Regulation
Source: PLoS One. 2010 Nov 2;5(11):e13798. doi: 10.1371/journal.pone.0013798 (PMC2970572; doi:10.1371/journal.pone.0013798)
Supplement: Table S2 — The predicted transcription start sites and promoter regions of 72 microRNAs, and their association with CpG islands. (0.04 MB XLS) [file pone.0013798.s005.xls]

## Sheet: New Four Samples
	Table S2 - The predicted transcription start sites and promoter regions of 72 microRNAs, and their association with CpG islands
	microRNA Annontation				MCF7 Control		MCF7 E2		MCF7-T Control		MCF7-T E2		CpG
	microRNA	Strand	Chromosome	microRNA position	TSS	Promoter	TSS	Promoter	TSS	Promoter	TSS	Promoter
	hsa-mir-21	+	chr17	55273409-55273480	55270009	55269401-55270457	55270009	55269501-55270451	55270009	55269342-55270496	55270009	55269293-55270563	0
	hsa-mir-1259	+	chr20	47330254-47330364	47328454	47328240-47328987	47328454	47328129-47329005	47328454	47328240-47328993	47328454	47328162-47329040	1
	hsa-let-7i	+	chr12	61283733-61283816	61282533	61281672-61283602	61282733	61281950-61283931	61282733	61281964-61283607	61282733	61281773-61283878	1
	hsa-mir-320a	-	chr8	22158420-22158501	22158501	22157794-22158988	22158501	22158009-22158916	22158501	22158125-22158963	22158501	22158058-22159062	1
	hsa-mir-940	+	chr16	2261749-2261842	2258149	2257591-2258782	2258149	2257476-2258966	2258149	2257619-2258972	2257949	2257554-2258986	1
	hsa-mir-632	+	chr17	27701241-27701334	27701041	27700694-27702133	27701041	27700823-27701872	27701041	27700777-27701842	27701041	27700682-27702103	1
	hsa-mir-1289-1	-	chr20	33505190-33505333	33505933	33505544-33506664	33505933	33505524-33506969	33505933	33505530-33506639	33505933	33505601-33506742	1
	hsa-mir-484	+	chr16	15644652-15644730	15644652	15643760-15645783	15644652	15643918-15645447	15644652	15644077-15645353	15644652	15644214-15645178	0
	hsa-mir-1304	-	chr11	93106488-93106578	93114378	93114009-93115120	93114378	93113904-93114898	93114378	93113918-93114992	93114378	93113884-93114855	1
	hsa-mir-1285-2	-	chr2	70333554-70333641	70338841	70338357-70339475	70338841	70338296-70339184	70338841	70338135-70339288	70338841	70338200-70339265	1
	hsa-mir-505	-	chrX	138833973-138834056	138843456	138842217-138844022	138843456	138841643-138843834	138843456	138842214-138843926	138842856	138842217-138844036	1
	hsa-mir-141	+	chr12	6943521-6943615	6942521	6942334-6943083	6942521	6942103-6943267	6942521	6942403-6943049	6942521	6942233-6943245	0
	hsa-mir-200c	+	chr12	6943123-6943190	6942523	6942336-6943084	6942523	6942105-6943269	6942523	6942405-6943051	6942523	6942235-6943247	0
	hsa-mir-429	+	chr1	1094248-1094330	1088048	1087725-1088562	1088048	1087778-1088544	1088048	1087767-1088566	1088048	1087795-1088769	1
	hsa-mir-1281	+	chr22	39818463-39818516	39817263	39816595-39818602	39817263	39816630-39819129	39817663	39816608-39818947	39817263	39816777-39818931	1
	hsa-mir-200a	+	chr1	1093106-1093195	1088106	1087715-1088601	1088106	1087746-1088498	1088106	1087756-1088520	1088106	1087791-1088671	1
	hsa-mir-196a-2	+	chr12	52671789-52671898	52663789	52663238-52664580	52663789	52663144-52664639	52663789	52663244-52665379	52663789	52663452-52664601	0
	hsa-mir-200b	+	chr1	1092347-1092441	1088147	1087680-1088613	1088147	1087719-1088491	1088147	1087707-1088433	1088147	1087712-1088768	1
	hsa-mir-9-2	-	chr5	87998427-87998513	88007113	88005377-88008434	88006713	88005277-88008238	88006513	88005625-88008245	88006513	88005399-88008033	1
	hsa-mir-1282	-	chr15	41873149-41873249	41880249	41879468-41880955	41880049	41879613-41881010	41880049	41879521-41880804	41880049	41879641-41881001	1
	hsa-mir-639	+	chr19	14501355-14501452	14501355	14501081-14502156	14501355	14500953-14501959	14501355	14500949-14501983	14501355	14500848-14502042	1
	hsa-mir-375	-	chr2	219574611-219574674	219575074	219574215-219576132	219574874	219573738-219576490	219575074	219574323-219575296	219575074	219574239-219575211	1
	hsa-mir-659	-	chr22	36573631-36573727	36575327	36574178-36575739	36575327	36574528-36575826	36575327	36574260-36575779	36575327	36574730-36575821	1
	hsa-mir-545	-	chrX	73423664-73423769	73429369	73427905-73430375	73428969	73428400-73430165	73429369	73428342-73430197	73429369	73428278-73430280	1
	hsa-mir-658	-	chr22	36570225-36570324	36575324	36574170-36575737	36575324	36574514-36575837	36575324	36574679-36575666	36575324	36574725-36575824	1
	hsa-mir-203	+	chr14	103653495-103653604	103653095	103652896-103653629	103653095	103652302-103653903	103653095	103652757-103653838	103653095	103652665-103653644	1
	hsa-mir-769	+	chr19	51214030-51214147	51210430	51210139-51210859	51210430	51209916-51210805	51210430	51210091-51210782	51210430	51209790-51210912	1
	hsa-mir-374a	-	chrX	73423846-73423917	73428917	73428329-73430497	73428917	73428388-73430202	73429117	73428487-73430269	73429317	73428243-73430337	1
	hsa-mir-760	+	chr1	94084976-94085055	94083776	94083042-94085963	94084776	94084039-94086630	94084576	94083849-94087045	94084576	94084043-94086539	1
	hsa-mir-424	-	chrX	133508310-133508407	133511007	133510257-133511692	133511407	133510502-133511843	133511407	133510078-133511801	133511407	133510462-133511759	1
	hsa-mir-542	-	chrX	133503037-133503133	133511133	133510308-133511604	133511333	133510499-133511871	133511333	133510118-133511881	133511333	133510610-133511744	1
	hsa-mir-503	-	chrX	133508024-133508094	133511094	133510304-133511597	133511294	133510501-133511907	133511294	133510183-133511906	133511294	133510559-133511787	1
	hsa-mir-450a-1	-	chrX	133502037-133502127	133511127	133510301-133511598	133511327	133510503-133511869	133511327	133510114-133511873	133511327	133510604-133511739	1
	hsa-mir-450b	-	chrX	133501881-133501958	133510958	133510306-133511693	133511358	133510505-133511898	133511358	133510032-133511866	133511358	133510603-133511761	1
	hsa-mir-450a-2	-	chrX	133502204-133502303	133511103	133510319-133511582	133511303	133510493-133511899	133511303	133510097-133511885	133511303	133510581-133511756	1
	hsa-mir-92b	+	chr1	153431592-153431687	153430992	153430273-153431467	153430992	153430515-153431875	153430992	153430301-153431720	153430992	153430239-153431812	1
	hsa-mir-183	-	chr7	129201981-129202090	129207290	129206574-129208193	129207290	129206299-129208020	129207290	129206736-129207728	129207290	129206671-129207856	1
	hsa-mir-96	-	chr7	129201768-129201845	129207245	129206571-129208235	129207245	129206331-129208024	129207245	129206695-129207708	129207245	129206644-129207894	1
	hsa-mir-564	+	chr3	44878384-44878477			44878184	44878015-44879209	44878384	44877864-44878685	44878184	44877811-44879017	1
	hsa-mir-345	+	chr14	99843949-99844046	99841149	99840624-99841712	99842749	99840834-99843345	99842749	99840880-99843222	99842749	99841643-99843335	1
	hsa-mir-182	-	chr7	129197459-129197568	129207368	129206621-129208189	129207168	129206306-129208061	129207368	129206638-129207713	129207368	129206707-129207784	1
	hsa-mir-1208	+	chr8	129231544-129231616	129223544	129221590-129224559	129223544	129222022-129224371	129223544	129222187-129224545	129223344	129222127-129224666	0
	hsa-mir-146b	+	chr10	104186259-104186331	104181859	104181081-104182586	104182059	104181075-104182799	104182259	104181470-104182908	104182259	104181297-104182722	1
	hsa-mir-550-2	+	chr7	32739118-32739214			32734718	32733867-32735406	32734718	32733582-32735174	32734918	32733829-32735412	1
	hsa-let-7a-1	+	chr9	95978060-95978139			95968260	95967305-95969712	95968860	95967247-95969561	95968660	95966917-95969862	1
	hsa-mir-1826	+	chr16	33873009-33873093	33870609	33869733-33871619	33864609	33864405-33865298	33870609	33869927-33871879	33870609	33869816-33871543	1
	hsa-mir-923	-	chr17	30502292-30502346			30502346	30502018-30502617	30502346	30502039-30502654	30502546	30501868-30502661	0
	hsa-let-7f-1	+	chr9	95978450-95978536			95968650	95967585-95969645	95968850	95967238-95969580	95968650	95966918-95969901	1
	hsa-mir-101-1	-	chr1	65296705-65296779	65306179	65304809-65308089	65306179	65304732-65306980	65306179	65304847-65306885	65306179	65304870-65307065	1
	hsa-mir-193b	+	chr16	14305325-14305407			14303525	14303409-14305174					1
	hsa-mir-24-2	-	chr19	13808101-13808173			13814573	13814141-13815515	13814773	13813902-13815241	13814773	13814101-13815456	1
	hsa-mir-27a	-	chr19	13808254-13808331			13814731	13814291-13815331	13814731	13813824-13815299	13814731	13814149-13815425	1
	hsa-mir-23a	-	chr19	13808401-13808473			13814673	13814292-13815328	13814673	13813873-13815366	13814673	13814131-13815478	1
	hsa-mir-19a	+	chr13	90801146-90801227			90797746	90797500-90798452			90797946	90797375-90798371	1
	hsa-mir-130b	+	chr22	20337593-20337674			20336193	20335054-20336810			20336393	20334995-20336790	1
	hsa-mir-17	+	chr13	90800860-90800943			90797860	90797494-90798384			90797860	90797464-90798322	1
	hsa-mir-301b	+	chr22	20337270-20337347			20336270	20334985-20336781					1
	hsa-mir-365-1	+	chr16	14310643-14310729	14303643	14303533-14303972	14303643	14303225-14304060					1
	hsa-mir-18a	+	chr13	90801006-90801076			90797806	90797467-90798492			90797806	90797399-90798474	1
	hsa-mir-19b-1	+	chr13	90801447-90801533			90797847	90797480-90798430			90797847	90797449-90798403	1
	hsa-mir-92a-1	+	chr13	90801569-90801646			90797769	90797450-90798538			90797769	90797390-90798532	1
	hsa-mir-20a	+	chr13	90801320-90801390			90797720	90797461-90798487			90797920	90797435-90798375	1
	hsa-mir-125a	+	chr19	56888319-56888404	56885719	56883012-56886121	56885319	56885176-56886394	56885719	56882092-56886119	56885319	56883112-56886340	0
	hsa-let-7e	+	chr19	56887851-56887929	56885451	56884876-56886396	56885451	56882127-56886520	56885251	56881647-56886441	56885251	56883268-56886318	0
	hsa-mir-99b	+	chr19	56887677-56887746	56885677	56882679-56886206	56885277	56881948-56886683	56885677	56882050-56886181	56885277	56883221-56886336	0
	hsa-mir-148a	-	chr7	25956064-25956131			25957731	25957069-25958413	25957331	25956965-25958252	25957731	25957065-25958272	1
	hsa-mir-663	-	chr20	26136822-26136914			26138114	26136469-26138595	26138114	26136868-26138491	26138114	26136776-26138498	1
	hsa-mir-135b	-	chr1	203684053-203684149	203685749	203685311-203685861	203685749	203685273-203685873					0
	hsa-mir-181d	+	chr19	13846689-13846825					13837889	13837386-13838256	13837889	13837608-13838469	1
	hsa-mir-181c	+	chr19	13846513-13846622					13837913	13837357-13838227	13837913	13837626-13838499	1
	hsa-mir-497	-	chr17	6861954-6862065					6864265	6863512-6864627	6864265	6863419-6864604	0
	hsa-mir-195	-	chr17	6861658-6861744					6864344	6863591-6864542	6864144	6863388-6864558	0
