# Supplementary material for: RNA Polymerase II Binding Patterns Reveal Genomic Regions Involved in MicroRNA Gene Regulation
Source: PLoS One. 2010 Nov 2;5(11):e13798. doi: 10.1371/journal.pone.0013798 (PMC2970572; doi:10.1371/journal.pone.0013798)
Supplement: Table S3 — Annotations of predicted promoters of intronic microRNAs. (0.05 MB XLS) [file pone.0013798.s006.xls]

## Sheet: Sheet1
	Table S3 - Annotations of predicted promoters of intronic microRNAs
	microRNA Annontation				Host gene Annotation		Predicted microRNA Promoter
	ID	Strand	Chr	microRNA Position	Gene Symbol	Gene Position	MCF7 Control	MCF7 E2	MCF7-T Control	MCF7-T E2
	hsa-mir-1290	-	chr1	19096152-19096229	ALDH4A1	19070512-19101659	19101281-19103025	19101237-19102560	19101312-19103242	19101230-19103014
	hsa-mir-554	+	chr1	149784896-149784991	TUFT1	149779404-149822683	149778472-149780010	149778726-149779921	149778678-149779876	149778788-149779943
	hsa-mir-9-1	-	chr1	154656757-154656845	C1orf61	154640678-154665808	154657896-154658361	154657729-154658605	154657877-154658350	154657750-154658392
	hsa-mir-205	+	chr1	207672101-207672210	LOC642587	207668790-207672515	207667862-207669182	207667911-207669189	207667577-207669033	207667167-207669088
	hsa-mir-1307	-	chr10	105144000-105144148	USMG5	105138803-105146213	105145804-105146805	105145756-105146852	105145404-105146728	105145839-105146764
	hsa-mir-611	-	chr11	61316543-61316609	C11orf10	61313180-61316661	61312652-61317871	61312774-61318317	61316038-61317121	61312694-61317988
	hsa-mir-616	-	chr12	56199213-56199309	DDIT3	56196637-56200567	56200136-56201023	56199904-56200842	56199981-56200777	56199754-56200909
	hsa-mir-1201	-	chr14	19864446-19864530	CCNB1IP1	19849368-19871297	19870793-19871601	19870942-19871631	19870889-19871669	19870787-19871667
	hsa-mir-627	-	chr15	40279060-40279156	VPS39	40238190-40287794	40287305-40289209	40287329-40288560	40287437-40288458	40287213-40288685
	hsa-mir-22	-	chr17	1563947-1564031	C17orf91	1561552-1566254	1565896-1568234	1565938-1568081	1565889-1568098	1565964-1568003
	hsa-mir-33b	-	chr17	17657875-17657970	SREBF1	17,656,111-17,667,669	17667035-17667858	17666870-17667938	17667221-17668120	17667004-17667973
	hsa-mir-423	+	chr17	25468223-25468316	CCDC55	25467959-25537612	25467472-25468828	25467590-25468375	25467506-25468423	25467406-25468576
	hsa-mir-301a	-	chr17	54583279-54583364	FAM33A	54542089-54587582	54586218-54588335	54586024-54588118	54586263-54588011	54586105-54588132
	hsa-mir-636	-	chr17	72244127-72244225	SFRS2	72241791-72245007	72244726-72246014	72244721-72245837	72244687-72245761	72244700-72245706
	hsa-mir-1227	-	chr19	2185061-2185148	PLEKHJ1	2184154-2187328	2187043-2190744	2187011-2188936	2187003-2188206	2186982-2188181
	hsa-mir-637	-	chr19	3912412-3912510	DAPK3	3,909,452-3,922,038	3921873-3922991	3921555-3922872	3921669-3922804	3921556-3922765
	hsa-mir-1181	-	chr19	10375134-10375214	CDC37	10362808-10375271	10371256-10376539	10371317-10377299	10371293-10377057	10371280-10376520
	hsa-mir-1238	+	chr19	10523798-10523880	ATG4D	10515646-10525094	10514979-10515955	10515078-10516253	10514951-10516035	10514775-10516136
	hsa-mir-638	+	chr19	10690080-10690179	DNM2	10689754-10803579	10688986-10689959	10688816-10689981	10688886-10689952	10688810-10690029
	hsa-mir-641	-	chr19	45480290-45480388	AKT2	45428063-45483105	45483084-45483781	45482851-45483758	45482605-45484189	45482797-45484033
	hsa-mir-330	-	chr19	50834092-50834185	EML2	50804497-50834509	50833991-50834793	50834024-50834766	50834054-50834985	50834231-50834891
	hsa-mir-935	+	chr19	59177373-59177463	CACNG8	59158105-59177951	59174874-59175916	59174762-59175954	59174964-59176022	59174864-59175866
	hsa-mir-559	+	chr2	47458318-47458413	TACSTD1	47449970-47467661	47449332-47450305	47449321-47450776	47449296-47450734	47449326-47450713
	hsa-mir-933	-	chr2	175740607-175740683	ATF2	175647251-175741143	175740019-175741916	175740106-175742066	175740333-175741889	175740361-175741978
	hsa-mir-26b	+	chr2	218975613-218975689	CTDSP1	218972721-218978908	218967760-218972884	218968329-218974154	218968234-218974156	218969244-218973500
	hsa-mir-1244	+	chr2	232286268-232286352	PTMA	232281478-232286494	232281184-232281968	232279097-232282370	232279072-232281843	232278961-232281937
	hsa-mir-1306	+	chr22	18453581-18453665	DGCR8	18447833-18479400	18447086-18448029	18446934-18447905	18446798-18448242	18446996-18447919
	hsa-mir-425	-	chr3	49032585-49032671	DALRD3	49027438-49033471	49033406-49034197	49033397-49034247	49033468-49034235	49033584-49034481
	hsa-mir-191	-	chr3	49033055-49033146	DALRD3	49027438-49033471	49033561-49034308	49033567-49034289	49033626-49034352	49033645-49034296
	hsa-mir-15b	+	chr3	161605070-161605167	SMC4	161600123-161635435	161598935-161600546	161599208-161600755	161599054-161600578	161599270-161600606
	hsa-mir-16-2	+	chr3	161605227-161605307	SMC4	161600123-161635435	161598971-161600598	161599230-161600798	161599093-161600571	161599278-161600642
	hsa-mir-1248	+	chr3	187987155-187987260	EIF4A2	187984054-187990379	187983451-187984547	187983410-187984478	187983461-187984584	187983408-187984543
	hsa-mir-1229	-	chr5	179157884-179157952	MGAT4B	179156710-179166547	179166119-179166653	179166187-179167206	179165568-179167454	179165392-179167258
	hsa-mir-1236	-	chr6	32032595-32032696	RDBP	32027842-32034843	32034247-32035234	32034235-32035658	32034220-32035277	32034300-32035691
	hsa-mir-339	-	chr7	1029095-1029188	FP15621	1,003,168-1,034,501	1034337-1035956	1034019-1035720	1034128-1035758	1034135-1035574
	hsa-mir-335	+	chr7	129923188-129923281	MEST	129913281-129933367	129912807-129914303	129913017-129914420	129913004-129913951	129912977-129914002
	hsa-mir-671	+	chr7	150566440-150566557	CSGlcA-T	150560517-150566838	150560010-150560786	150560007-150561574	150559914-150561654	150560043-150560803
	hsa-mir-937	-	chr8	144967115-144967200	SCRIB	144945077-144969537	144969306-144971545	144969233-144971306	144969602-144971346	144968820-144971728
	hsa-mir-661	-	chr8	145091347-145091435	PLEC1	145061308-145119628	145098281-145099440	145098082-145099303	145098010-145099353	145098017-145099456
	hsa-mir-1234	-	chr8	145596284-145596367	CPSF1	145589253-145605541	145605139-145606723	145604656-145606376	145605070-145606545	145605016-145606571
	hsa-mir-1237	+	chr11	63892650-63892751	RPS6KA4	63883200-63896263		63882673-63883677	63882740-63883891	63882565-63883848
	hsa-mir-1292	+	chr20	2581423-2581488	NOL5A	2581253-2587039		2580001-2581870	2580371-2581977	2580024-2581856
	hsa-let-7g	-	chr3	52277334-52277417	WDR82	52263477-52287699		52286043-52288914	52286295-52288683	52286077-52289231
	hsa-mir-580	-	chr5	36183751-36183847	LMBRD2	36139170-36187772	36187019-36188572	36187226-36188422	36186617-36188485	36186840-36188464
	hsa-mir-550-1	+	chr7	30295935-30296031	ZNRF2	30290447-30373833		30289975-30292819	30290025-30292432	30289711-30291836
	hsa-mir-7-1	-	chr9	85774483-85774592	HNRPK	85772911-85785339	85784264-85787913	85783709-85788314	85784129-85787393	85783389-85786057
	hsa-mir-618	-	chr12	79853646-79853743	LIN7A	79715301-79855825		79853974-79856163	79853133-79856179
	hsa-mir-642	+	chr19	50870026-50870122	GIPR	50863341-50877557	50862946-50864594
	hsa-mir-378	+	chr5	149092581-149092646	PPARGC1B	149090056-149207462			149089799-149090339	149089788-149091690
	hsa-mir-25	-	chr7	99529119-99529202	MCM7	99528339-99536316		99535871-99538135		99535752-99537954
	hsa-mir-93	-	chr7	99529327-99529406	MCM7	99528339-99536316		99535851-99538147		99535753-99537950
	hsa-mir-106b	-	chr7	99529552-99529633	MCM7	99528339-99536316		99535847-99538122		99535672-99537817
